# Supplementary material for: TLR9 and STING agonists synergistically induce innate and adaptive type-II IFN
Source: PubMed Central journal article supplement — Eur J Immunol. 2015 Feb 5;45(4):1159–69. doi: 10.1002/eji.201445132 (PMC4671267; doi:10.1002/eji.201445132), 2015-02-05
Supplement: eji0045-1159-sd1.pdf [file eji0045-1159-sd1.pdf]

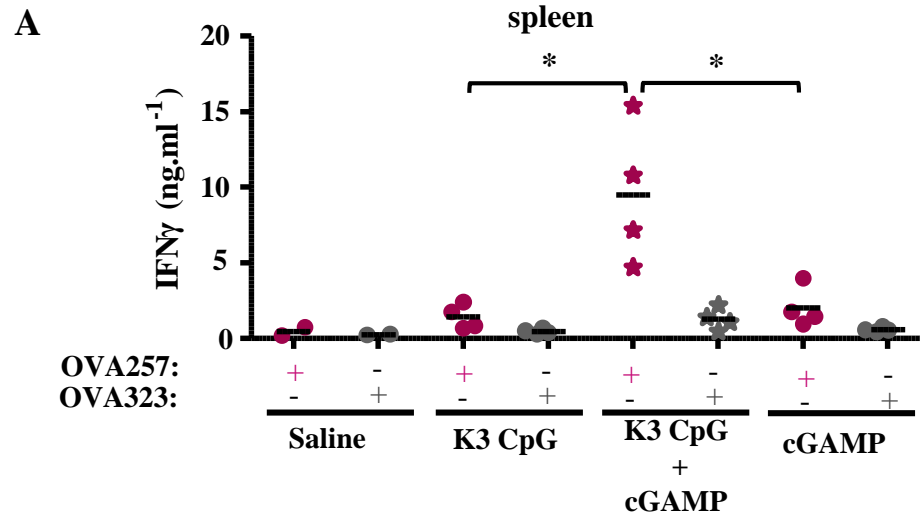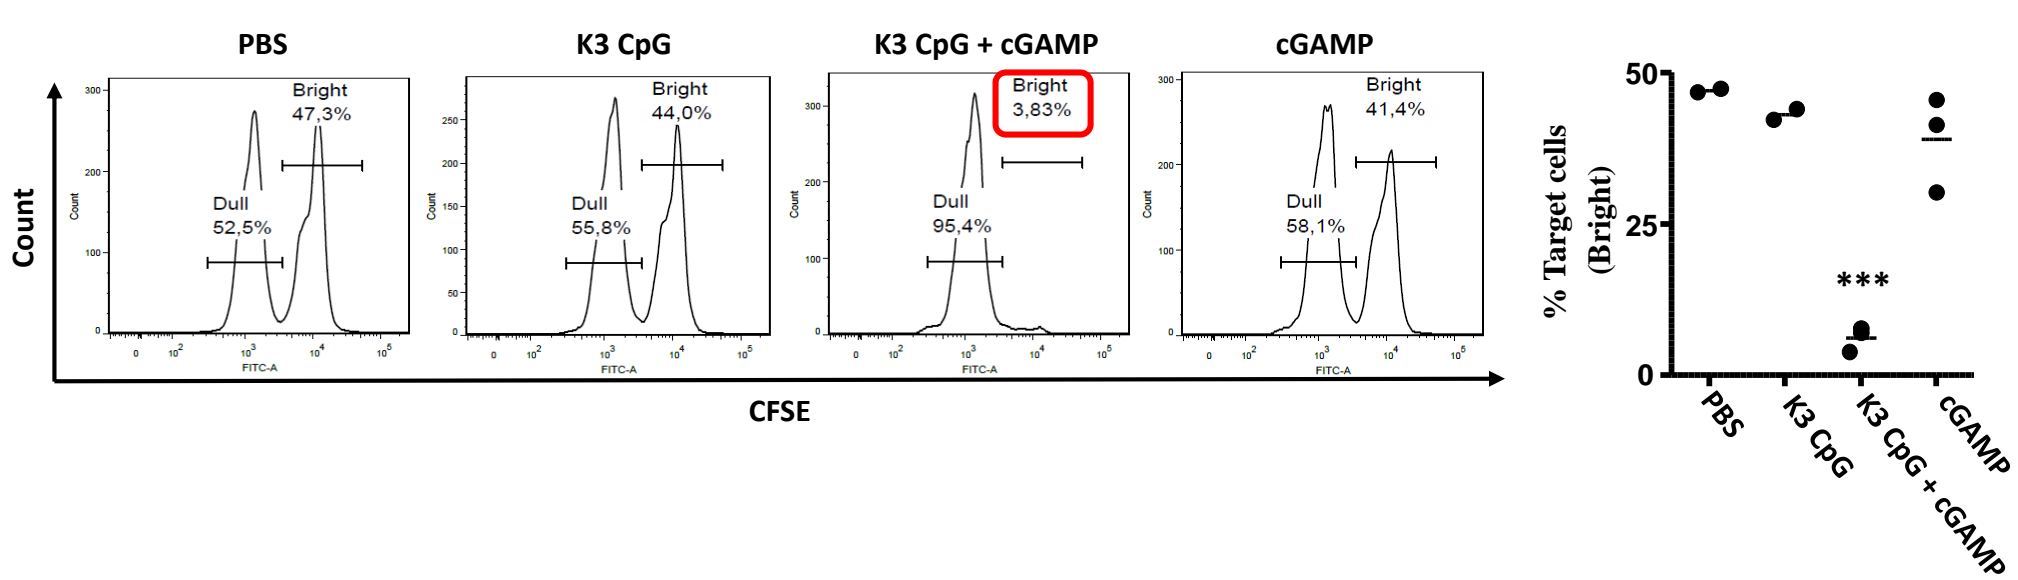

**Supporting Information Figure 1.** Combination of K3 CpG and cGAMP induces potent CD8<sup>+</sup> T cell activity in vivo. **(A)** Mice were immunized with OVA only (n=2), or OVA and either K3 CpG (n=4), cGAMP (n=4) or K3 + cGAMP (n=4) at days 0 and 10, via the intramuscular route. On day 17, spleen cells were isolated and stimulated with OVA, or OVA peptides that are specific for MHC class I (OVA 257) or MHC class II (OVA 323) for 48 h. Production of IFN- $\gamma$  was measured by ELISA. Data are representative of at least two independent experiments. \*p < 0.05; \*\*p < 0.01 (Student's t test). **(B)** Seven days after immunization with OVA only (n=2), or OVA and either K3 CpG (n=2), cGAMP (n=3) or K3 + cGAMP (n=3) via the intramuscular route, in vivo CTL assay was performed. Data are representative of two independent experiments. \*p < 0.05; \*\*p < 0.01; \*\*\*p < 0.001 (One-way ANOVA with Bonferroni's multiple comparison test).

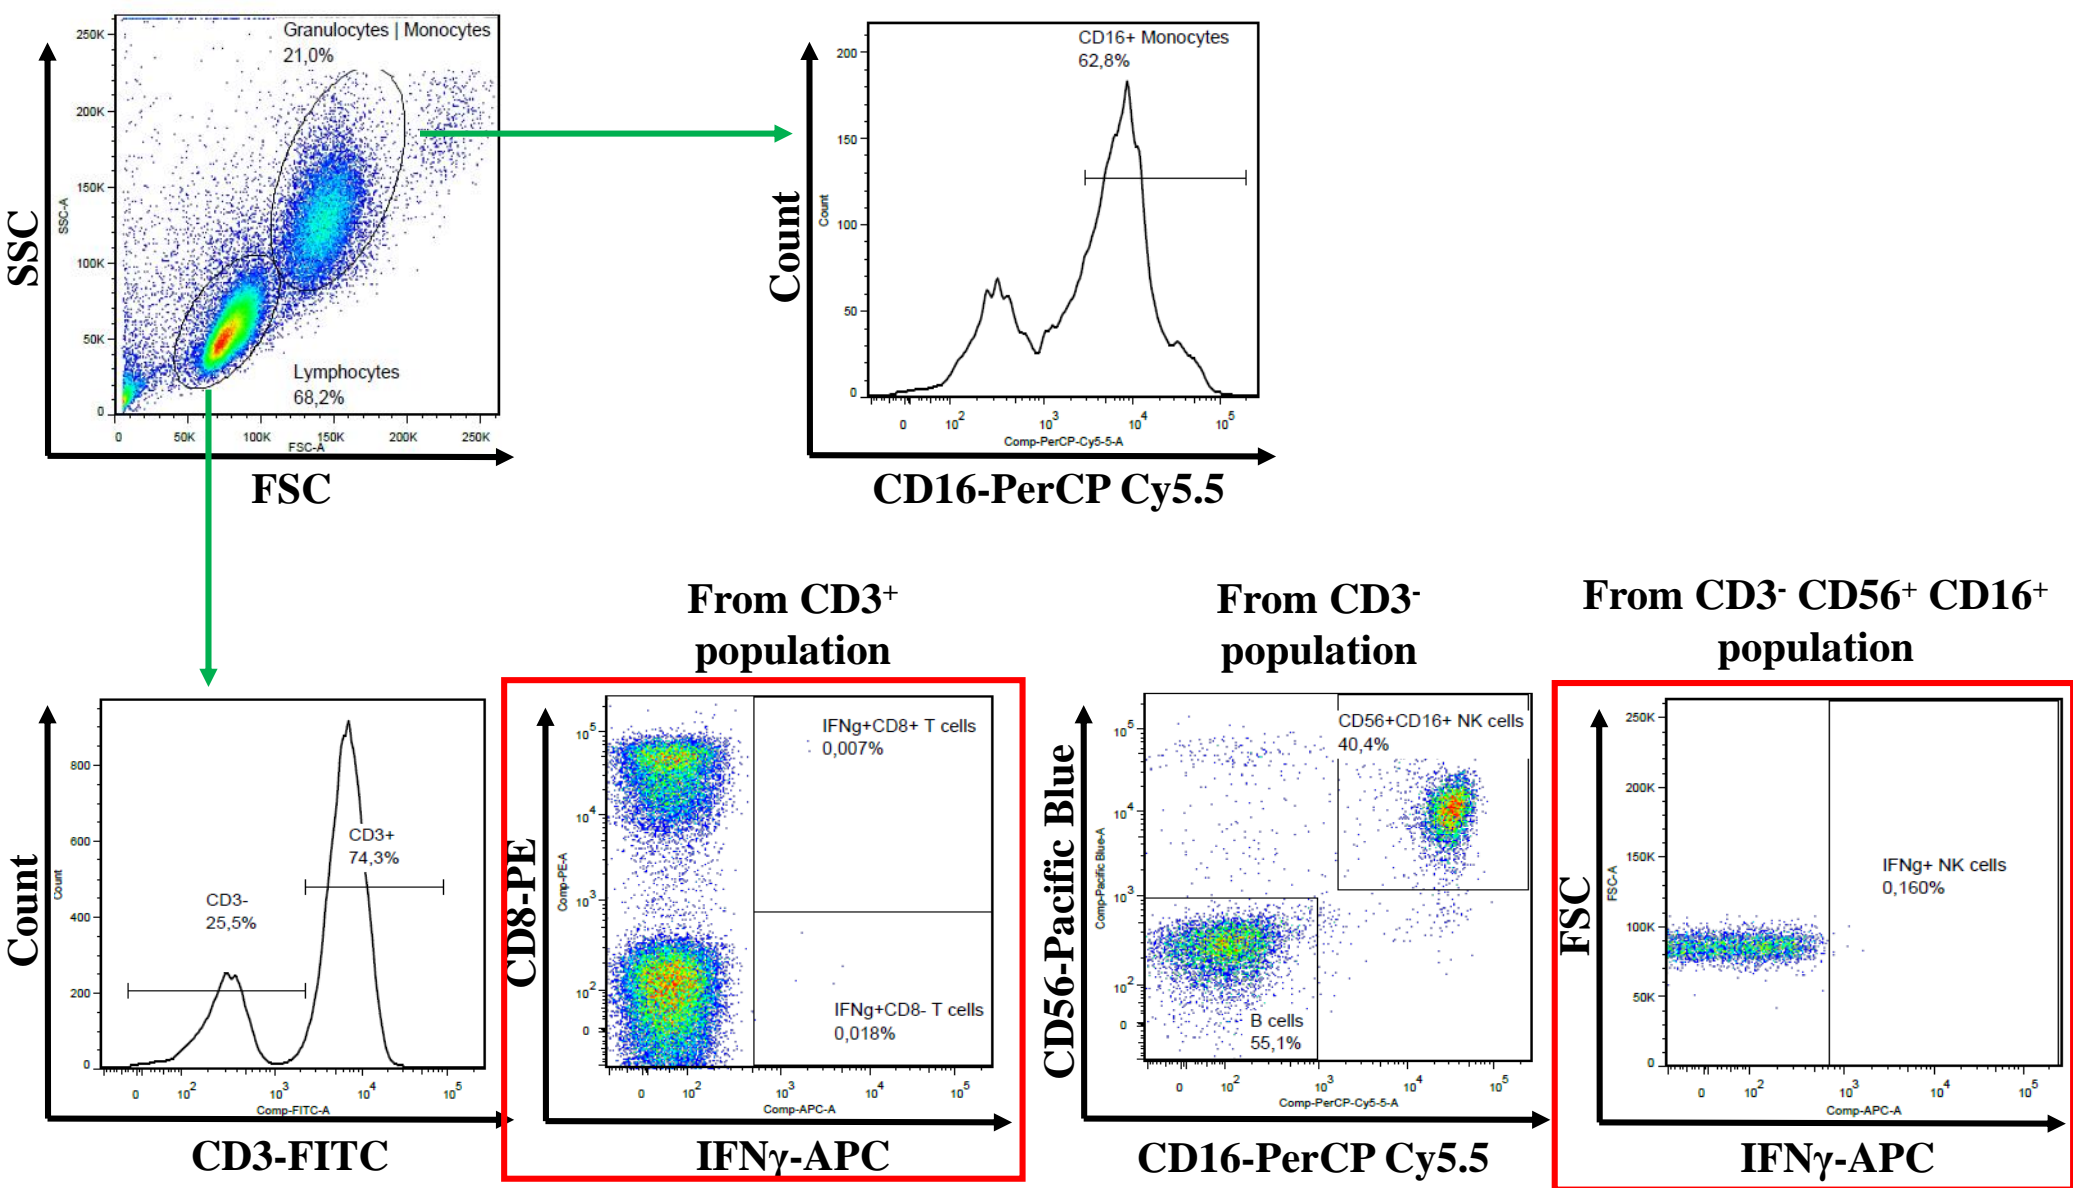

**Supporting Information Figure 2.** Gating strategy for intracellular IFN- $\gamma$  staining experiment in hPBMCs. First, CD3<sup>±</sup> cells were gated from the lymphocyte gate. Then, from the CD3<sup>+</sup> population, IFN- $\gamma$ <sup>+</sup> CD8<sup>±</sup> cells were gated and are shown in the results. NK cells were gated from the CD3<sup>-</sup> CD56<sup>+</sup> CD16<sup>+</sup> population and IFN- $\gamma$ <sup>+</sup> NK cells are shown in the results.

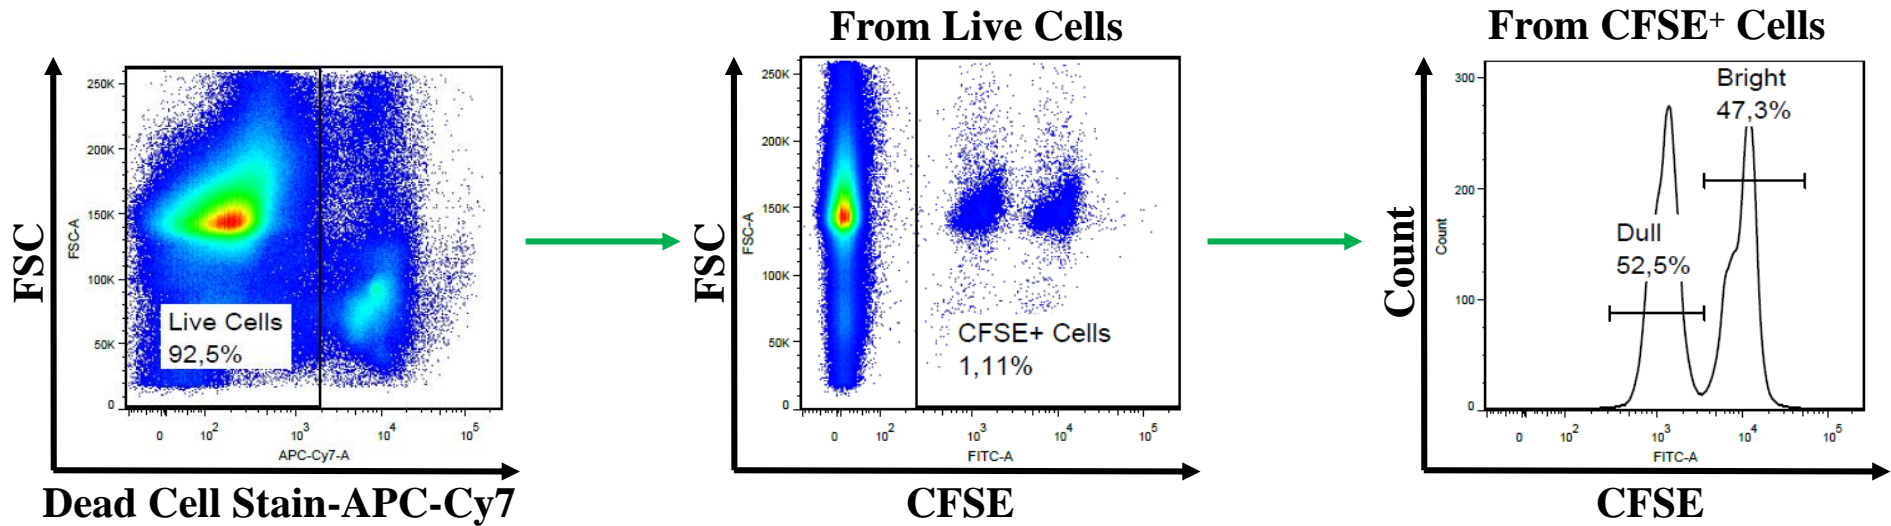

**Supporting Information Figure 3.** Gating strategy for in vivo CTL assay. CFSE<sup>+</sup> cells were gated from the live cells, which are negative for the dead cell stain. Histograms, which were drawn with the CFSE<sup>+</sup> cells, show the target cells (bright) that are pulsed with the OVA 257 (MHC Class I-specific peptide), and non-target cells (dull).

A

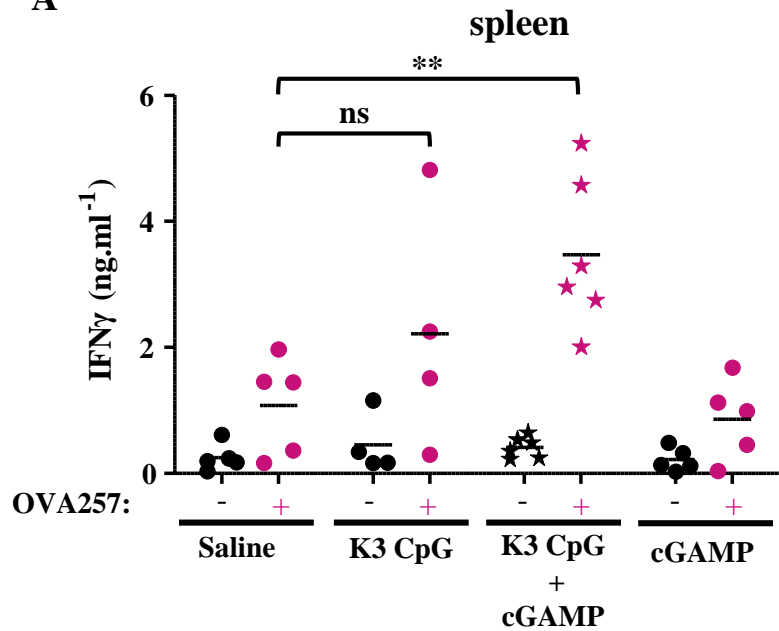

B

## EG-7 Tumor Growth in RAG2 KO

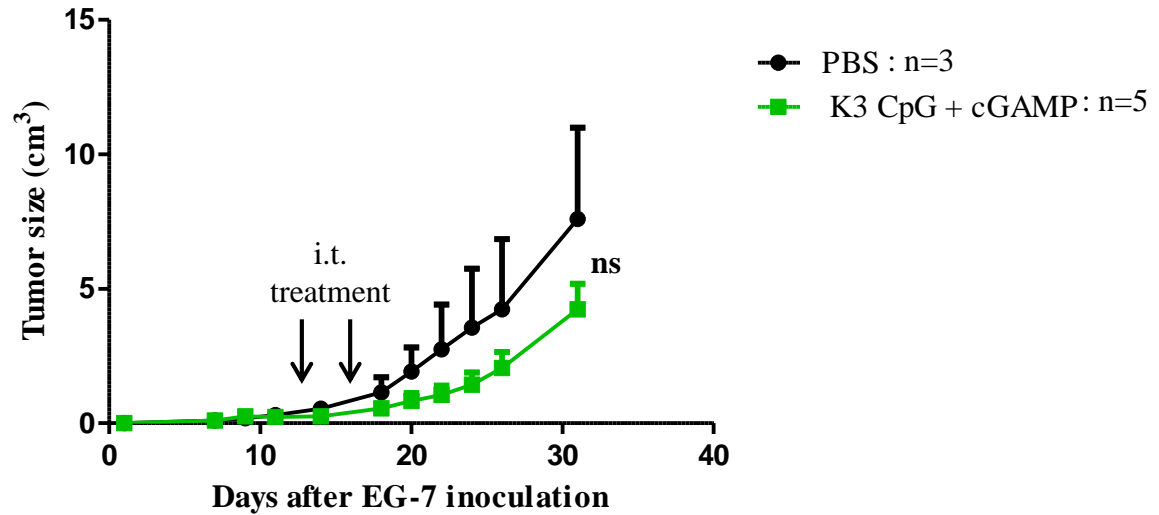

**Supporting Information Figure 4.** CD8<sup>+</sup> T cell activity, but not NK cell activity, is required for the anti-tumor effect of the combination of K3 CpG and cGAMP in the EG-7 tumor model. **(A)** Mice were injected with  $1 \times 10^6$  EG-7 lymphoma cells (in 100  $\mu$ l of PBS) subcutaneously on day 0. On days 7 and 10, mice were given intra-tumor injections of PBS (n=5), K3 CpG (n=4), cGAMP (n=5), or K3 CpG + cGAMP (n=6). On day 23, spleen cells were isolated and stimulated with the OVA peptide that is specific for MHC class I (OVA 257) for 48 h. Production of IFN- $\gamma$  was measured by ELISA. Data are representative of two independent experiments. **(B)** RAG2 KO mice were injected with  $1 \times 10^6$  EG-7 lymphoma cells (in 100  $\mu$ l of PBS) subcutaneously on day 0. On days 8 and 11, mice were given intra-tumor injections of PBS (n=3), or K3 CpG + cGAMP (n=5), and mice were monitored for tumor growth for 31 days. Data are shown as the mean + SEMs. \*p < 0.05; \*\*p < 0.01 (Mann-Whitney U test).

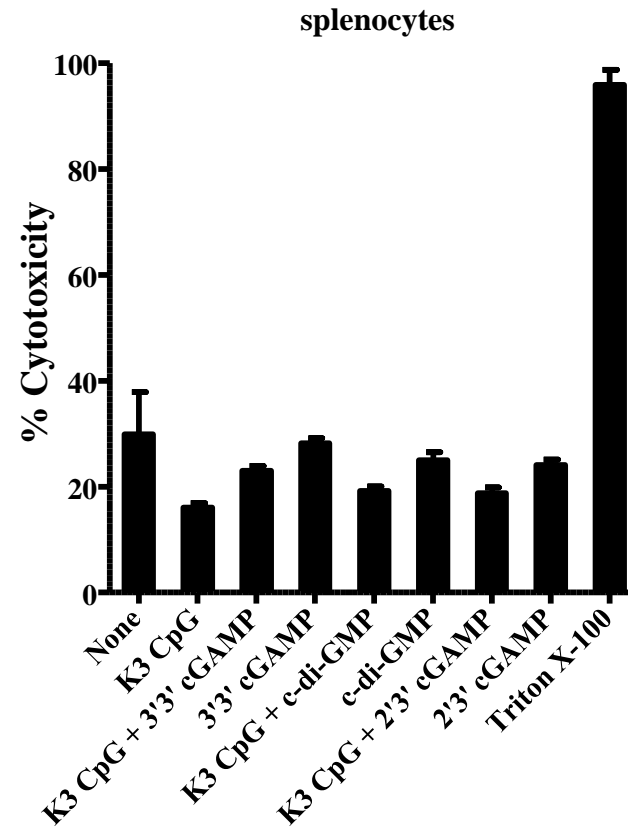

**Supporting Information Figure 5.** Cytotoxicity of the STING ligands in the splenocytes. Splenocytes were stimulated with K3 CpG (10  $\mu$ g/ml), STING-agonists (10  $\mu$ M), or K3 CpG + STING-agonists for 24 h in 96-well round-bottom plates and % cytotoxicity was determined by measuring LDH release with the Non-Radioactive Cytotoxicity Assay Kit (Promega). Triton X-100 treatment was used as the positive control. Data are shown as the mean + SD of duplicates.

A

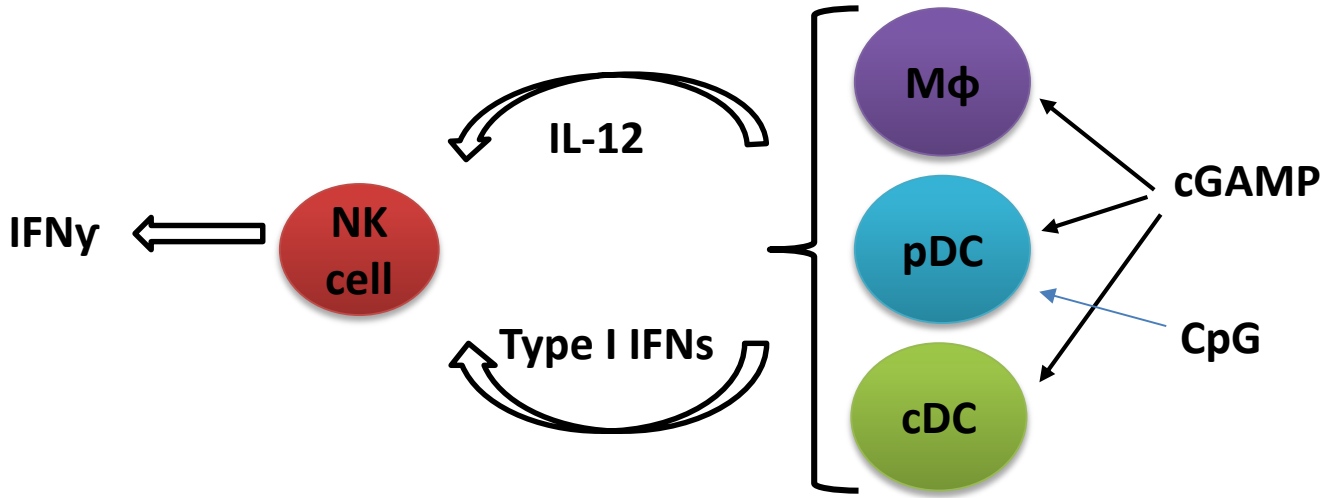

B

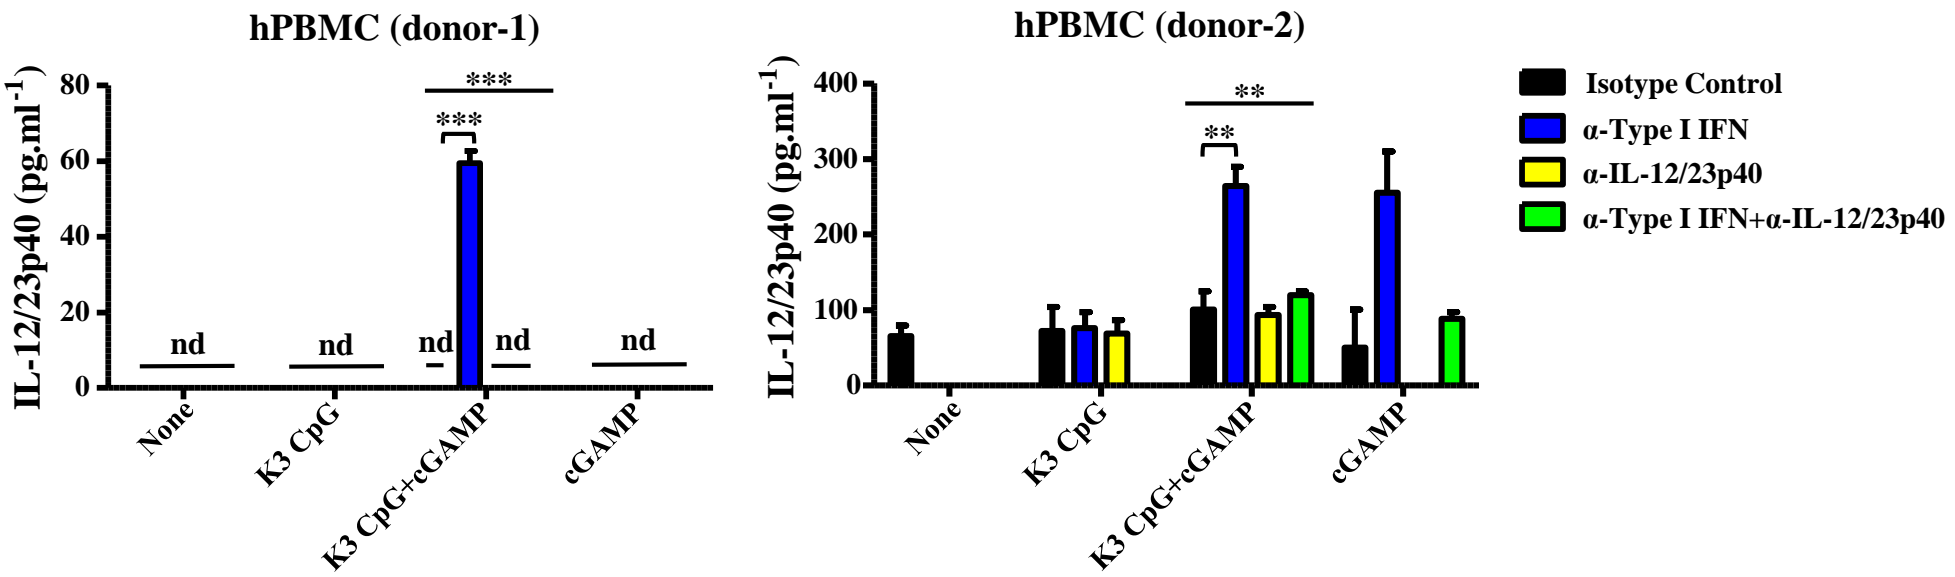

**Supporting Information Figure 6.** (A) Proposed mechanisms of innate IFN- $\gamma$  synergy. pDCs are the main responders to the K3 CpG while cGAMP stimulates cells including cDCs, macrophages and, maybe pDCs, to produce high amounts of IL-12 and type I IFNs. Then, by signaling through IL-12 and type I IFN receptors, these cytokines synergize in the induction of IFN- $\gamma$  in NK cells. (B) IL-12 production is increased in the human PBMCs that are treated with type I IFN neutralizing antibodies. Human PBMCs from two healthy donors were treated with 5  $\mu$ g/ml of isotype control, Type I IFN neutralizing, IL-12/23p40 neutralizing or Type I IFN + IL-12/23p40 neutralizing antibodies 30 minutes prior to 24 h of stimulation with K3 CpG, cGAMP, or K3 CpG + cGAMP. IL-12 production was measured by ELISA (nd: non-detected). Data are shown as the mean + SD of duplicates. \*p < 0.05; \*\*p < 0.01; \*\*\*p < 0.001 (One-way ANOVA with Bonferroni's multiple comparison test).



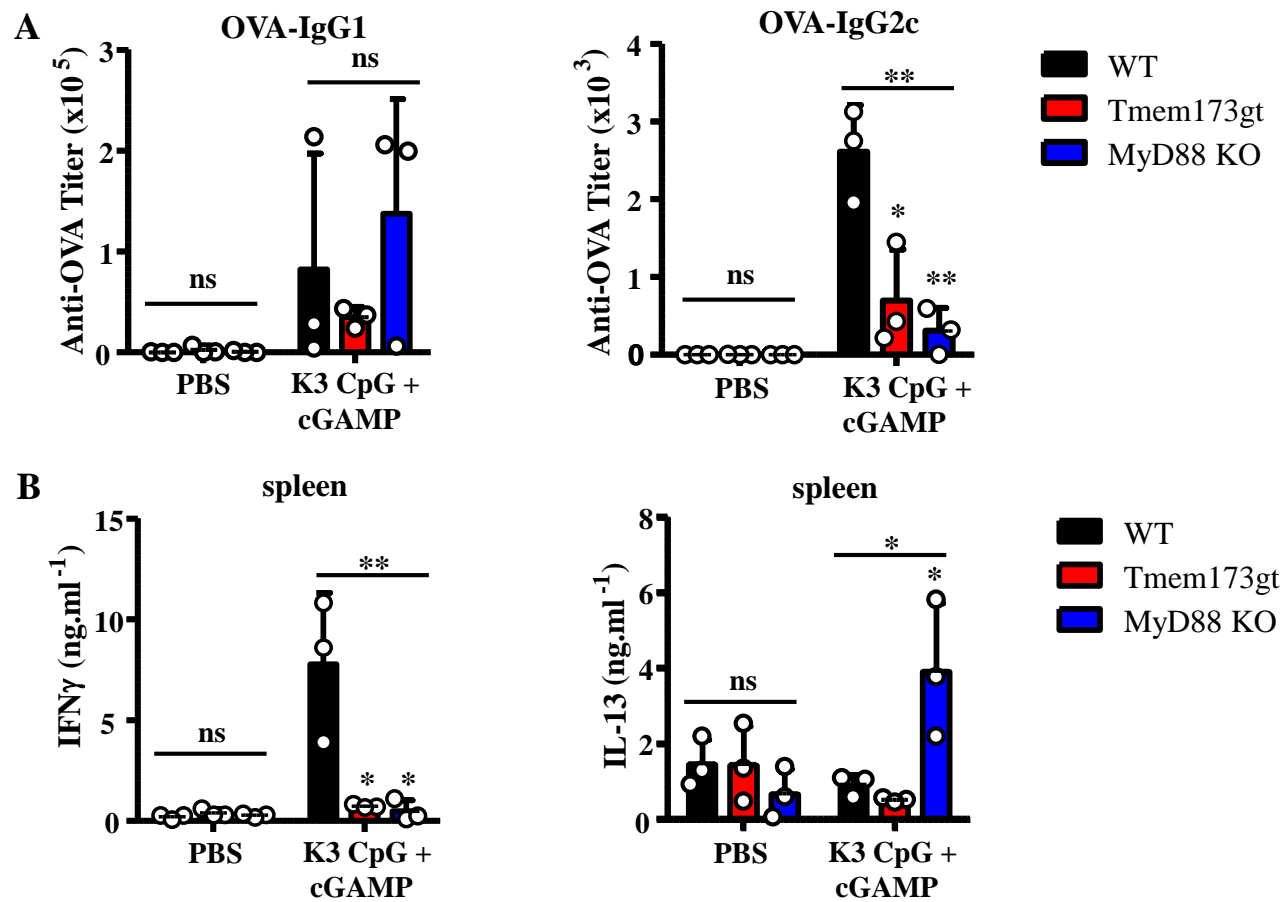

**Supporting Information Figure 7.** No significant differences were observed between the PBS immunization groups of WT and STING mutant, or MyD88 KO mice. WT, Tmem173gt, and MyD88 KO C57BL/6J mice were immunized with OVA (n=3) only, or OVA and K3 + cGAMP (n=3) at days 0 and 10, via the intramuscular route. **(A)** On day 17, OVA-specific serum IgG2c and IgG1 were measured by ELISA. **(B)** Spleen cells were stimulated with OVA for 48 h. Production of IL-13 and IFN- $\gamma$  were measured by ELISA. Data are shown as the mean + SD. \* $p < 0.05$ ; \*\* $p < 0.01$  (One-way ANOVA with Bonferroni's multiple comparison test).
